# Supplementary material for: Construction of a Generic and Evolutive Wheel and Lexicon of Food Textures
Source: MDPI journal article supplement (doi:10.3390/foods11193097), 2022-10-05
Supplement: s1 [file s1]

**Table S1.** Texture attributes mentioned more than three times in articles and reviews from the literature research.

| Adjectival form      | Occurrence |
|----------------------|------------|
| Firm                 | 12         |
| Mealy                | 11         |
| Grainy               | 10         |
| Oily                 |            |
| Fat                  | 8          |
| Chalky               |            |
| Gritty               |            |
| Hard                 | 7          |
| Sticky               |            |
| Fibrous              |            |
| Moist                |            |
| Particles            |            |
| Smooth               |            |
| Adhesive             | 6          |
| Starchy              |            |
| Fatty                |            |
| Soft                 |            |
| Sandy                |            |
| Gummy                |            |
| Rough                | 5          |
| Cohesive             |            |
| Greasy               |            |
| Dry                  |            |
| Chewy                |            |
| Crumbly              |            |
| Crunchy              |            |
| Powdery              | 4          |
| Spongy               |            |
| Thick                |            |
| Tender               |            |
| Lumpy                |            |
| Creamy               |            |
| Dense                |            |
| Flaky                |            |
| Foamy                |            |
| Juicy                | 3          |
| Slimy                |            |
| Snap                 |            |
| Thin                 |            |
| Pulpy                |            |
| Tough                |            |
| 121 other attributes | < 3        |
